# Supplementary material for: Intrinsic therapeutic and biocatalytic roles of ionic liquid mediated self-assembled platinum–phytase nanospheres
Source: Royal Society of Chemistry journal article supplement (doi:10.1039/c5ra11273g), 2015-01-01
Supplement: c5ra11273g1.pdf [file c5ra11273g1.pdf]

## **Intrinsic therapeutic and biocatalytic Roles of ionic liquid mediated self-assembled platinum-phytase nanosphere**

**Sarvesh K Soni<sup>a,\*</sup>, ‡, Sampa Sarkar<sup>a,b,‡</sup>, Selvakannan R. Periasamy<sup>a</sup>, Dhiman Sarkar<sup>b</sup>, Suresh K Bhargava<sup>a\*</sup>**

<sup>a</sup>Centre for Advanced Materials and Industrial Chemistry, School of Applied Sciences, RMIT University, GPO Box 2476V, Melbourne, VIC, Australia, 3001.

<sup>b</sup>Combichem Bioresource Centre, National Chemical Laboratory, Pune, India.

\*Author to whom correspondence should be addressed. Phone: +61 +61 3 9925 2397. Fax: +61 3 9925 2882. E-mail: sarveshkumar.soni@rmit.edu.au

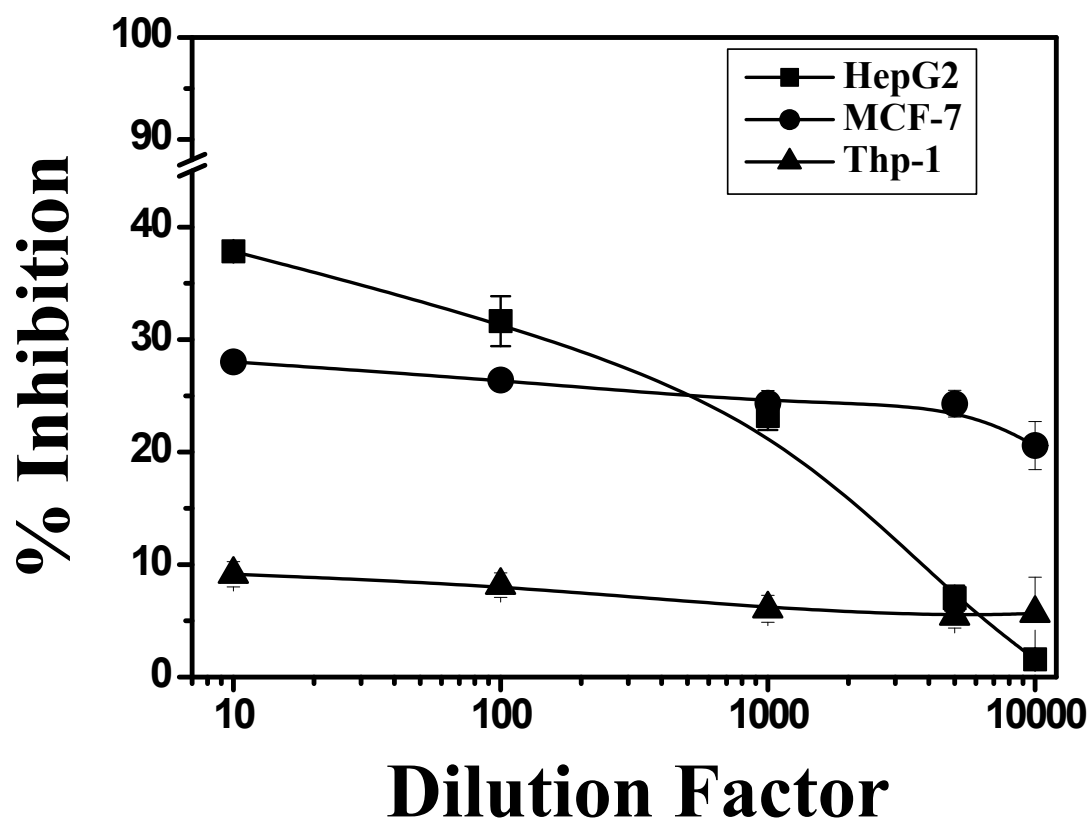

**Figure S1.** Cytotoxicity of  $K_2PtCl_6$  ( $10^{-3}$  M) on HepG2 human hepatocellular carcinoma, MCF-7 breast cancer and THP-1 human acute monocytic leukemia cells. 5  $\mu$ l of sample was used for  $2 \times 10^4$  cancer cells.

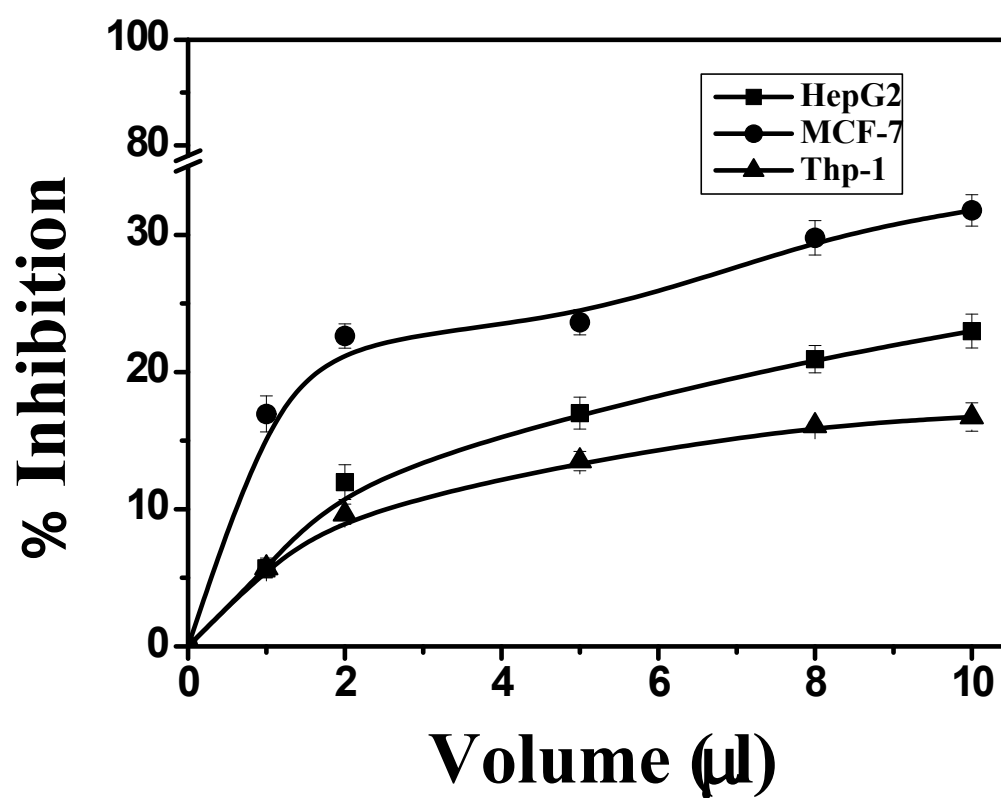

**Figure S2.** Cytotoxicity of Oleic acid (undiluted) on inhibition of HepG2 human hepatocellular carcinoma, MCF-7 breast cancer and THP-1 human acute monocytic leukemia cells.

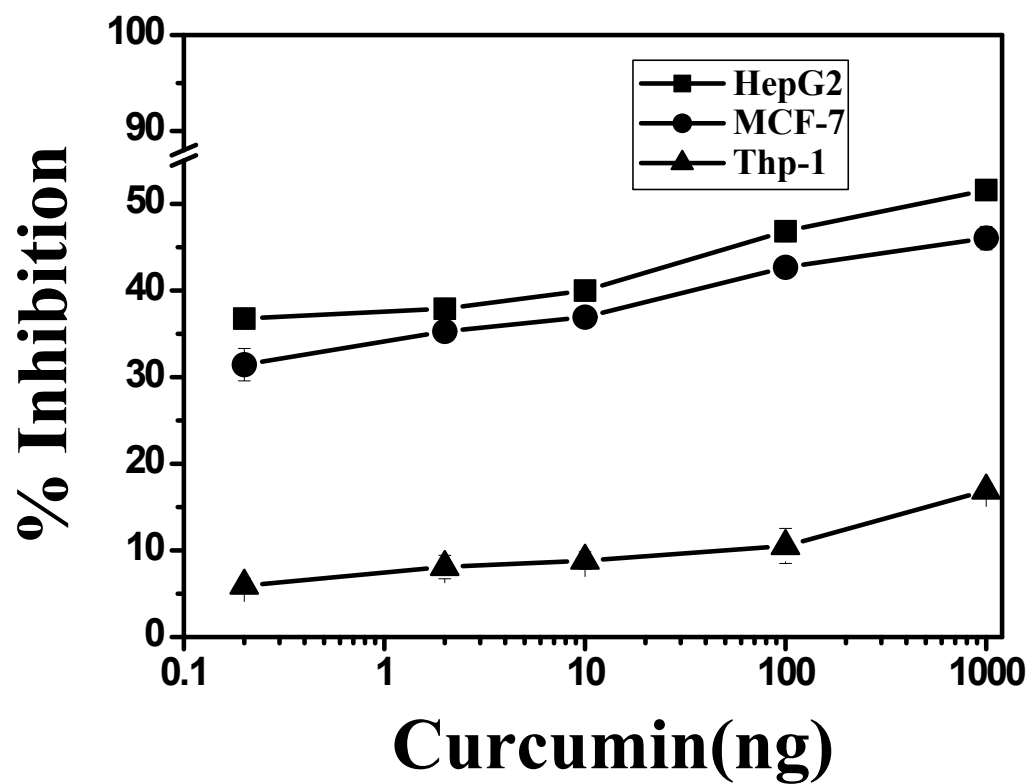

**Figure S3.** Cytotoxicity of Curcumin (dissolved in Oleic acid) on inhibition of HepG2 human hepatocellular carcinoma, MCF-7 breast cancer and THP-1 human acute monocytic leukemia cells. 5  $\mu$ l of sample was used for  $2 \times 10^4$  cancer cells.

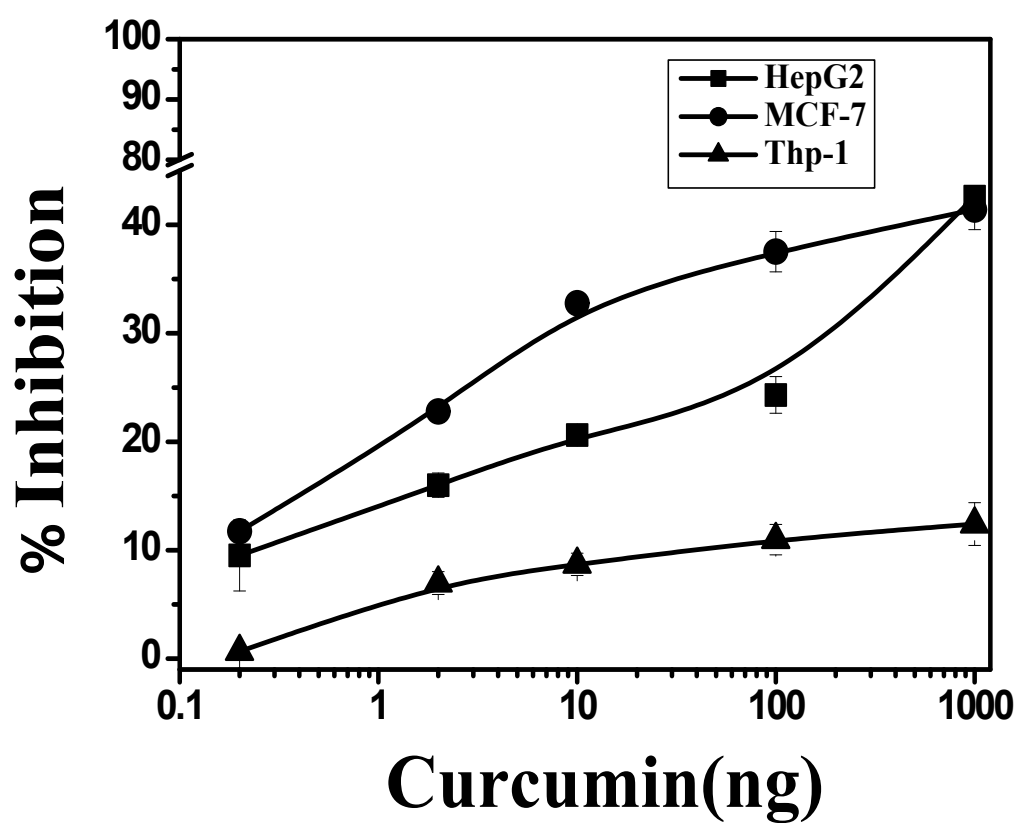

**Figure S4.** Cytotoxicity of Curcumin (dissolved in D/W) on inhibition of HepG2 human hepatocellular carcinoma, MCF-7 breast cancer and THP-1 human acute monocytic leukemia cells. 5  $\mu$ l of sample was used for  $2 \times 10^4$  cancer cells.

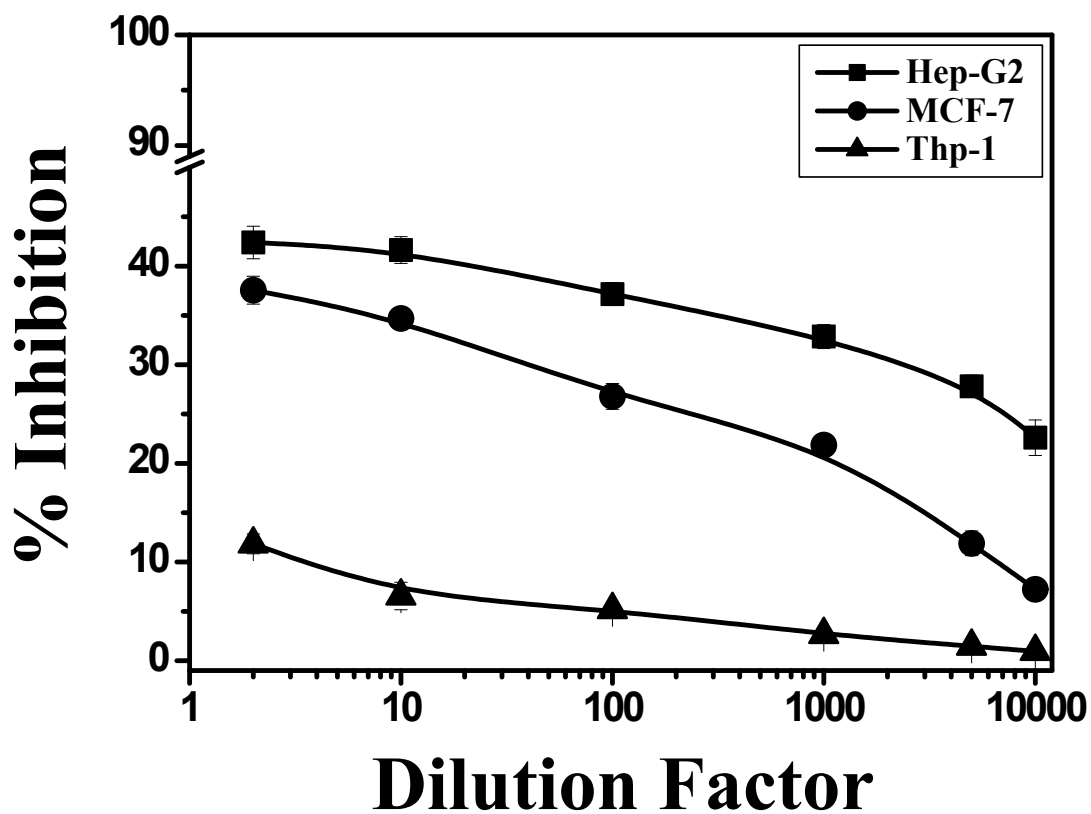

**Figure S5.** Cytotoxicity of Ionic Liquid [BMIM][BF<sub>4</sub>] (diluted in D/W) on inhibition of HepG2 human hepatocellular carcinoma, MCF-7 breast cancer and THP-1 human acute monocytic leukemia cells. 5  $\mu$ l of sample was used for  $2 \times 10^4$  cancer cells.

**F. N:** Every experimental point value is in triplicate.

Incubation time: HepG2 cell: 4 days, MCF-7 cell: 7 days, THP-1 cell: 5 days
